# Supplementary material for: Comprehensive National Inpatient Sample data reveals low but rising Pneumocystis jiroveci pneumonia risk in inflammatory bowel disease patients
Source: PubMed Central journal article supplement — Ann Gastroenterol. 2022 Apr 8;35(3):260–6. doi: 10.20524/aog.2022.0713 (PMC9062846; doi:10.20524/aog.2022.0713), 2022-04-08
Supplement: AnnGastroenterol-35-260_Suppl1.pdf [file AnnGastroenterol-35-260_Suppl1.pdf]

## Supplementary material

**Supplementary Table 1** Elixhauser comorbidity index

|                                                 |
|-------------------------------------------------|
| Category                                        |
| Congestive heart failure                        |
| Valvular disease                                |
| Pulmonary circulation disorders                 |
| Peripheral vascular disorders                   |
| Hypertension                                    |
| Paralysis                                       |
| Other neurologic disorders                      |
| Chronic pulmonary disease                       |
| Diabetes, uncomplicated                         |
| Diabetes, complicated                           |
| Hypothyroidism                                  |
| Renal failure                                   |
| Liver disease                                   |
| Peptic ulcer disease                            |
| AIDS                                            |
| Lymphoma                                        |
| Metastatic cancer                               |
| Solid tumor without metastasis                  |
| Rheumatoid arthritis/collagen vascular diseases |
| Coagulopathy                                    |
| Obesity                                         |
| Weight loss                                     |
| Fluid and electrolyte disorders                 |
| Blood loss anemia                               |
| Deficiency anemias                              |
| Alcohol abuse                                   |
| Drug abuse                                      |
| Psychoses                                       |
| Depression                                      |
